# Supplementary material for: Highly ordered gold-nanotube films for flow-injection amperometric glucose biosensors
Source: Royal Society of Chemistry journal article supplement (doi:10.1039/c4ra05273k), 2014-09-03
Supplement: c4ra05273k1.pdf [file c4ra05273k1.pdf]

*Electronic Supplementary Information*

## Highly ordered gold-nanotube films for flow-injection amperometric glucose biosensors

MinHo Yang,<sup>a</sup> Kyoung G. Lee,<sup>b</sup> Jung Won Kim,<sup>c</sup> Seok Jae Lee,<sup>b</sup> Yun Suk Huh\*<sup>d</sup> and Bong Gill Choi\*<sup>c</sup>

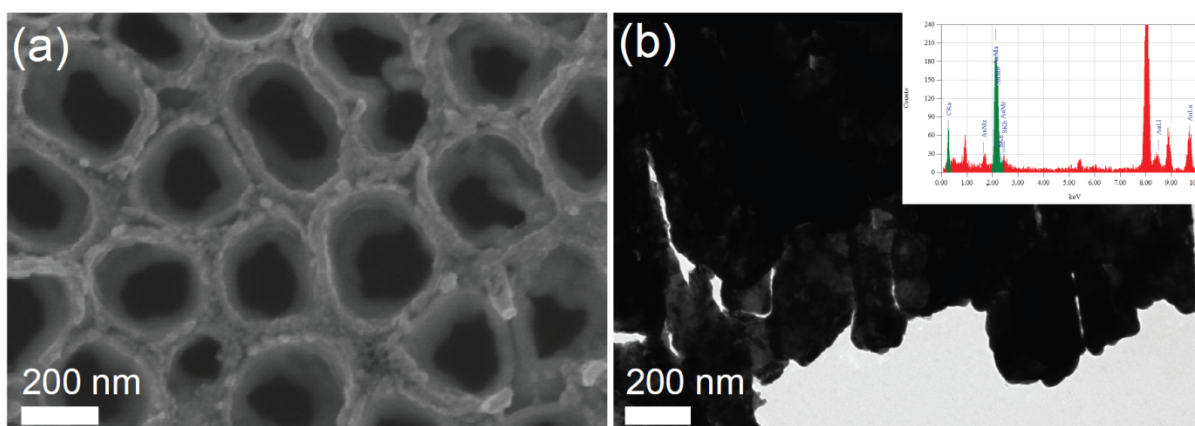

**Fig. S1** (a) SEM and (b) TEM images of GOx/ANFE (Inset image is energy dispersive X-ray analysis.).

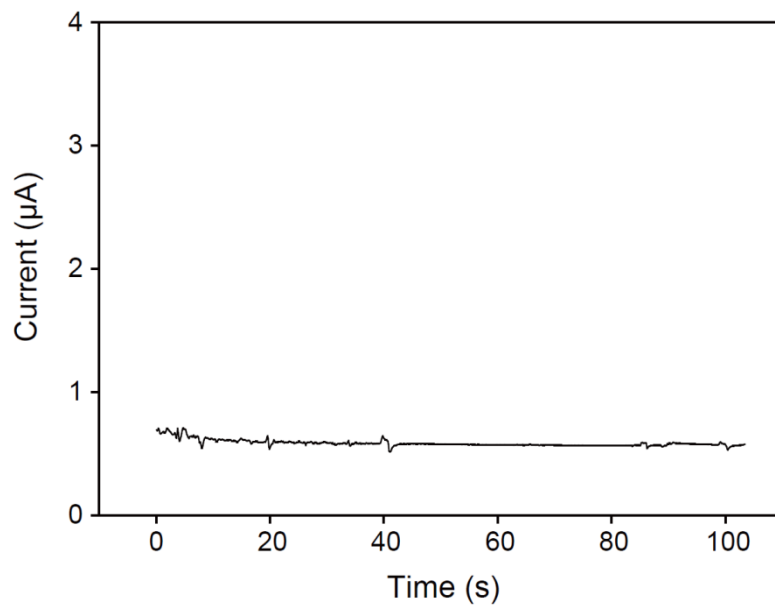

**Fig. S2** Background current of GOx/ANFE biosensor using PBS solution in the flow injection system at +0.5 V.

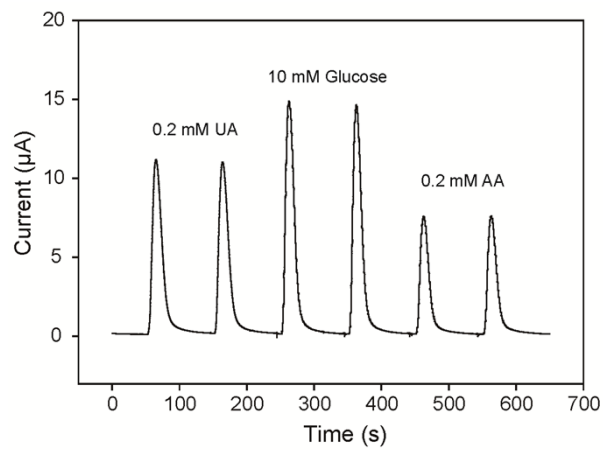

**Fig. S3** Effect of interfering species of 0.2 mM UA, 10 mM glucose, 0.2 mM AA on the GOx/ANFE biosensor at operating potential of + 0.5 V.

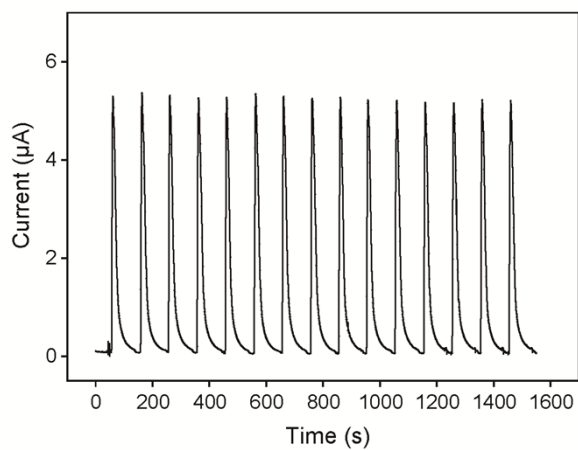

**Fig. S4** Amperometric responses of GOx/ANFE electrode-based fluidic biosensor by repeating fifteen times injection of glucose with concentration of 4 mM at +0.5 V.
